# Supplementary material
Source: PubMed Central journal article supplement (PMC9197199)

Supplementary Figure 1: Uncropped western blots for Extended Data Fig. 5e

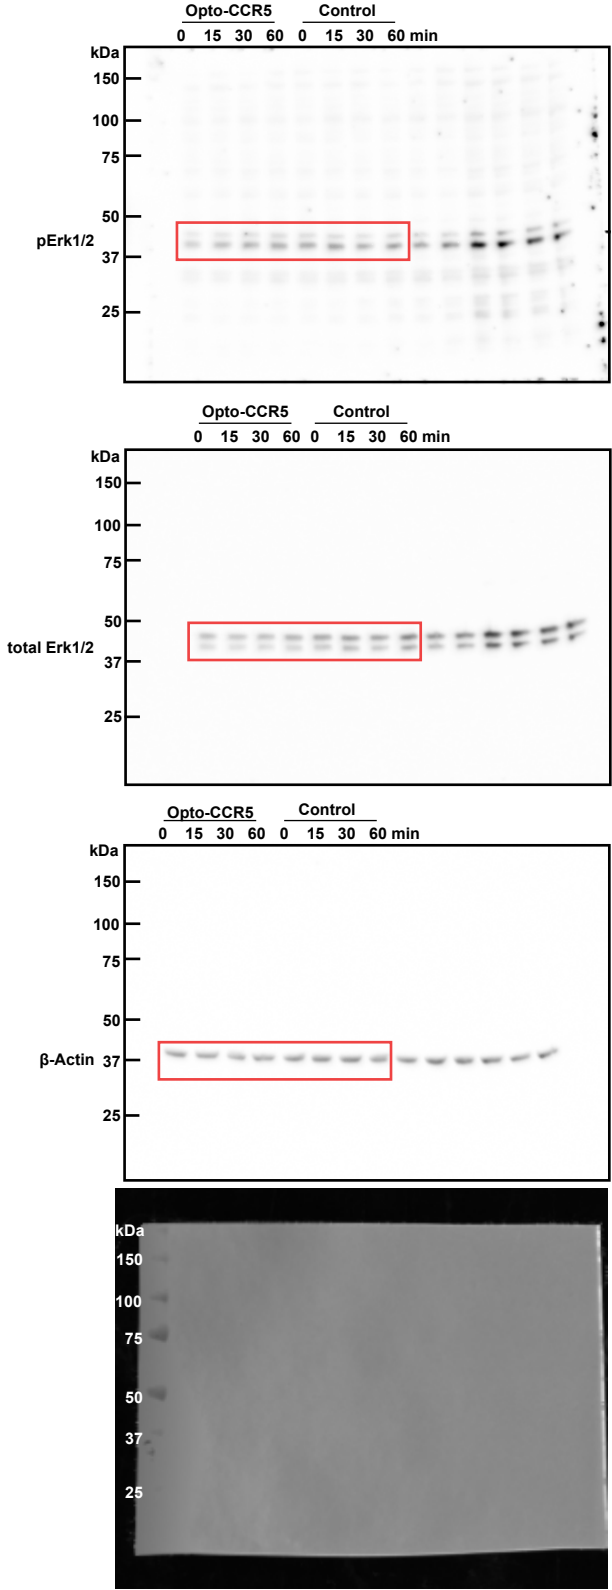

Supplement: NIHMS1805157-supplement-1805157_Sup_Fig_1.pdf [file NIHMS1805157-supplement-1805157_Sup_Fig_1.pdf]
